# Supplementary material
Source: MDPI journal article supplement (https://www.mdpi.com/1424-2818/15/9/1024)
Supplement: s1 [file s1]

Supplementary material to article:

# Dynamics of zooplankton along the Romanian Black Sea coastline: temporal variation, community structure, and environmental drivers.

Elena Bişnicu<sup>1\*</sup>, Luminița Lazăr<sup>2\*</sup>, Florin Timofte<sup>3\*</sup>

1 Ecology and Marine Biology Department, National Institute for Marine Research and Development “Grigore Antipa”, 300 Mamaia Blvd., 900581, Constanta, Romania, ebisnicu@alpha.rmri.ro (E.B.)

2 Chemical Oceanography and Marine Pollution Department, National Institute for Marine Research and Development “Grigore Antipa”, 300 Mamaia Blvd., 900581, Constanta, Romania; llazar@alpha.rmri.ro (L.L.)

3 National Institute for Marine Research and Development “Grigore Antipa”, 300 Mamaia Blvd., 900581, Constanta, Romania

\* Correspondence: ebisnicu@alpha.rmri.ro (E.B.); llazar@alpha.rmri.ro (L.L.); ftimofte@alpha.rmri.ro (F.T.)

**Table S1.** List of zooplankton taxa identified until 2020 along the Romanian Black Sea coastline (after Timofte F., 2017 and personal observations).

| No. | Taxa                                                          | Petran, 1994 |      |      |      |      |      | Porumb, 1994 -1995 | Onciu, Skolka, Gomoiu, 2006 | Timofte, 2017 |           | Bişnicu, 2022 |
|-----|---------------------------------------------------------------|--------------|------|------|------|------|------|--------------------|-----------------------------|---------------|-----------|---------------|
|     |                                                               | 1986         | 1987 | 1988 | 1989 | 1990 | 1991 | 1994-1995          | 1995-2003                   | 2004-2010     | 2011-2012 | 2013-2020     |
|     | <b>DINOFLAGELLATA</b>                                         |              |      |      |      |      |      |                    |                             |               |           |               |
| 1   | <i>Noctiluca scintillans</i> (Macartney) Kofoed & Swezy, 1921 | +            | +    | +    | +    | +    | +    | +                  | +                           | +             | +         | +             |
|     | <b>CILIOPHORA</b>                                             |              |      |      |      |      |      |                    |                             |               |           |               |
|     | <b>ANNELIDA</b>                                               |              |      |      |      |      |      |                    |                             |               |           |               |
| 2   | <b>POLYCHAETA</b> (larvae: trocophore, nectocheta )           | +            | +    | +    | +    | +    | +    |                    | +                           | +             | +         | +             |

| No. | Taxa                                                                                       | Petran, 1994 |      |      |      |      |      | Porumb, 1994 -1995 | Onciu, Skolka,<br>Gomoiu, 2006 | Timofte, 2017 |           | Bişinicu, 2022 |
|-----|--------------------------------------------------------------------------------------------|--------------|------|------|------|------|------|--------------------|--------------------------------|---------------|-----------|----------------|
|     |                                                                                            | 1986         | 1987 | 1988 | 1989 | 1990 | 1991 | 1994-1995          | 1995-2003                      | 2004-2010     | 2011-2012 | 2013-2020      |
| 3   | <b>BRYOZOA</b> (larvae: cyphonautes)                                                       |              |      |      |      |      |      |                    | +                              | +             |           |                |
| 4   | <b>PHORONIDA</b> (larvae: actinotrocha)                                                    |              |      |      |      |      |      |                    | +                              | +             | +         |                |
| 5   | <i>Phoronis reticulatum</i> (Linnaeus, 1767) (sin.: <i>P. euxinicola</i> Saint-Long, 1907) |              |      |      |      |      |      |                    |                                | +             |           |                |
|     | <b>ARTHROPODA</b>                                                                          |              |      |      |      |      |      |                    |                                |               |           |                |
|     | <b>CRUSTACEA</b>                                                                           |              |      |      |      |      |      |                    |                                |               |           |                |
|     | <b>Cladocera</b>                                                                           |              |      |      |      |      |      |                    |                                |               |           |                |
| 6   | <i>Bosmina (Bosmina) longirostris</i> (O.F. Müller, 1785)                                  | +            | +    | +    | +    | +    | +    | +                  | +                              | +             | +         | +              |
| 7   | <i>Chydorus sphaericus</i> (O.F. Müller, 1785)                                             |              |      |      |      |      |      |                    | +                              | +             | +         | +              |
| 8   | <i>Daphnia cucullata</i> Sars, 1862                                                        |              |      |      |      |      |      |                    |                                | +             | +         |                |
| 9   | <i>Daphnia longispina</i> O.F. Müller, 1785                                                | +            | +    | +    | +    | +    | +    | +                  | +                              | +             | +         | +              |
| 10  | <i>Diaphanosoma brachiurum</i> (Lievin, 1848)                                              | +            | +    |      |      |      |      | +                  | +                              |               |           | +              |
| 11  | <i>Evadne nordmanni</i> Loven, 1836                                                        |              |      |      |      |      |      | +                  | +                              |               |           |                |
| 12  | <i>Evadne spinifera</i> O.F. Müller, 1867                                                  | +            | +    | +    | +    | +    | +    | +                  | +                              | +             | +         | +              |
| 13  | <i>Penilia avirostris</i> Dana, 1849                                                       | +            | +    | +    | +    | +    | +    | +                  | +                              | +             |           | +              |
| 14  | <i>Pleopis polyphemoides</i> (Leucart, 1859)                                               | +            | +    | +    | +    | +    | +    | +                  | +                              | +             | +         | +              |
| 15  | <i>P. tergestina</i> (Claus, 1877)(sin.: <i>Pseudevadne tergestina</i> (Claus, 1877)       | +            | +    | +    | +    | +    | +    | +                  | +                              | +             | +         | +              |
| 16  | <i>Podon intermedius</i> Lilljeborg, 1853                                                  |              |      |      |      |      |      | +                  | +                              | +             | +         | +              |

| No. | Taxa                                                                                       | Petran, 1994 |      |      |      |      |      | Porumb, 1994 -1995 | Onciu, Skolka,<br>Gomoiu, 2006 | Timofte, 2017 |           | Bişinicu, 2022 |
|-----|--------------------------------------------------------------------------------------------|--------------|------|------|------|------|------|--------------------|--------------------------------|---------------|-----------|----------------|
|     |                                                                                            | 1986         | 1987 | 1988 | 1989 | 1990 | 1991 | 1994-1995          | 1995-2003                      | 2004-2010     | 2011-2012 | 2013-2020      |
| 17  | <i>P. leuckartii</i> (G.O. Sars, 1862)                                                     |              |      |      |      |      |      | +                  | +                              |               |           |                |
|     | <b>Copepoda</b>                                                                            |              |      |      |      |      |      |                    |                                |               |           |                |
|     | <b>Calanoida</b>                                                                           |              |      |      |      |      |      |                    |                                |               |           |                |
| 18  | <i>Acartia (Acartiura) clausi</i> Giesbrecht, 1889                                         | +            | +    | +    | +    | +    | +    | +                  | +                              | +             | +         | +              |
| 19  | <i>A. clausi</i> Giesbrecht, 1890 small form                                               |              |      |      |      |      |      |                    |                                | +             |           |                |
| 20  | <i>A. tonsa</i> Dana, 1849                                                                 |              |      |      |      |      |      |                    |                                | +             |           |                |
| 21  | <i>Anomalocera patersonii</i> Templeton, 1837                                              |              |      |      |      |      |      | +                  | +                              |               |           |                |
| 22  | <i>Arctodiaptomus salinus</i> (Daday)                                                      |              |      |      |      |      |      |                    | +                              |               |           |                |
| 23  | <i>Calanipeda aquae-dulcis</i> Kritczagin, 1873                                            | +            | +    | +    | +    | +    | +    | +                  | +                              |               |           |                |
| 24  | <i>Calanus euxinus</i> Hulsemann, 1991 (sin.: <i>C. helgolandicus</i> Claus, 1863)         | +            | +    | +    | +    | +    | +    | +                  | +                              | +             | +         | +              |
| 25  | <i>Centropages ponticus</i> Karavaev, 1894(sin.: <i>C. kröyeri pontica</i> Karavaev, 1895) | +            | +    | +    | +    | +    | +    | +                  | +                              | +             | +         | +              |
| 26  | <i>D. salinus</i> Daday, 1885                                                              |              |      |      |      |      |      | +                  |                                |               |           |                |
| 27  | <i>Eudiaptomus gracilis</i> (G. O. Sars, 1862)                                             |              |      |      |      |      |      |                    | +                              |               |           |                |
| 28  | <i>Eurytemora affinis</i> (Poppe, 1880)                                                    | +            | +    | +    | +    | +    | +    | +                  |                                | +             | +         |                |
| 29  | <i>Eurytemora hirundoides</i> (Nordquist, 1888)                                            | +            | +    | +    | +    | +    | +    |                    | +                              |               |           |                |
| 30  | <i>Eurytemora lacustris</i> (Poppe, 1887)                                                  |              |      |      |      |      |      |                    | +                              |               |           |                |
| 31  | <i>Paracalanus parvus</i> (Claus, 1863)                                                    |              |      |      |      |      |      | +                  | +                              | +             | +         | +              |

| No. | Taxa                                                                                                      | Petran, 1994 |      |      |      |      |      | Porumb, 1994 -1995 | Onciu, Skolka,<br>Gomoiu, 2006 | Timofte, 2017 |           | Bişinicu, 2022 |
|-----|-----------------------------------------------------------------------------------------------------------|--------------|------|------|------|------|------|--------------------|--------------------------------|---------------|-----------|----------------|
|     |                                                                                                           | 1986         | 1987 | 1988 | 1989 | 1990 | 1991 | 1994-1995          | 1995-2003                      | 2004-2010     | 2011-2012 | 2013-2020      |
| 32  | <i>Paracalanus pygmaeus</i>                                                                               | +            | +    | +    | +    | +    | +    |                    |                                |               |           |                |
| 33  | <i>Pontella mediterranea</i> (Claus, 1863)                                                                |              |      |      |      |      |      | +                  | +                              | +             | +         |                |
| 34  | <i>Pseudocalanus elongatus</i> (Boeck, 1872)                                                              | +            | +    | +    | +    | +    | +    | +                  | +                              | +             | +         | +              |
|     | <b>Cyclopoida</b>                                                                                         |              |      |      |      |      |      |                    |                                |               |           |                |
| 35  | <i>Cyclops. sp</i>                                                                                        |              |      |      |      |      |      |                    |                                | +             | +         | +              |
| 36  | <i>Cyclops frucifer</i> (Claus)                                                                           |              |      |      |      |      |      |                    |                                |               |           |                |
| 37  | <i>Cyclopina gracilis</i> Claus, 1863                                                                     |              |      |      |      |      |      |                    |                                |               |           |                |
| 38  | <i>Cyclops scutifer</i> G.O. Sars, 1863                                                                   |              |      |      |      |      |      |                    |                                |               |           |                |
| 39  | <i>C. strenuus</i> Fisch, 1851                                                                            |              |      |      |      |      |      |                    |                                |               |           |                |
| 40  | <i>C. vicinus</i> Ulgan, 1875                                                                             |              |      |      |      |      |      |                    |                                |               |           |                |
| 41  | <i>Oithona minuta</i> (Kritz, 1873) (sin: <i>O. nana</i> Giesbrecht, 1892)                                | +            | +    | +    | +    | +    | +    | +                  | +                              | +             | +         |                |
| 42  | <i>O. similis</i> Claus, 1863                                                                             | +            | +    | +    | +    | +    | +    | +                  | +                              | +             | +         | +              |
| 43  | <i>Oithona brevicornis brevicornis</i> Giesbrecht, 1891/ <i>Oithona davisae</i> Ferrari F.D. & Orsi, 1984 |              |      |      |      |      |      |                    |                                | +             | +         | +              |
|     | <b>Monstrilloida</b>                                                                                      |              |      |      |      |      |      |                    |                                |               |           |                |
| 44  | <i>Cymbasoma rigidum</i> Thompson I.C, 1888                                                               |              |      |      |      |      |      | +                  | +                              |               |           |                |
| 45  | <i>Cymbasoma longispinosum</i> Bourne 1890                                                                |              |      |      |      |      |      | +                  | +                              |               |           |                |
| 46  | <i>Cymbasoma thompsoni</i> (Giesbrecht, 1893) acceptata <i>Cymbasoma thompsonii</i> (Giesbrecht, 1893)    |              |      |      |      |      |      | +                  | +                              |               |           |                |

[illegible]

[illegible]



[illegible]



| No. | Taxa                                             | Aphia id | Year/Season |     |      |     |      |      |      |      |      |      |      |      |     |      |      |
|-----|--------------------------------------------------|----------|-------------|-----|------|-----|------|------|------|------|------|------|------|------|-----|------|------|
|     |                                                  |          | 2013        |     | 2014 |     |      | 2015 | 2016 |      | 2017 |      |      | 2018 |     | 2019 | 2020 |
|     |                                                  |          | Warm        |     | Warm |     | Cold | Warm | Cold | Warm | Cold | Warm | Cold | Warm |     | Warm | Warm |
|     | Classification                                   |          | May         | Aug | May  | Jul | Nov  | Jun  | Mar  | Aug  | Mar  | Jul  | Nov  | Jul  | Sep | Aug  | Jun  |
| 25  | POLYCHAETA**                                     | 883      | +           | +   | +    | +   | +    | +    | +    | +    | +    | +    | +    | +    | +   | +    | +    |
|     | CHAETOGNATHA *                                   |          | +           |     |      |     |      |      |      |      |      |      |      |      |     |      |      |
| 26  | <i>Parasagitta setosa</i> Müller, 1847*          | 105443   | +           | +   | +    | +   | +    | +    | +    | +    | +    | +    | +    | +    | +   | +    | +    |
|     | APPENDICULARIA                                   |          |             |     |      |     |      |      |      |      |      |      |      |      |     |      |      |
| 27  | <i>Oikopleura (Vexillaria) dioica</i> Fol, 1872* | 103407   | +           | +   | +    | +   | +    | +    | +    | +    | +    | +    | +    | +    | +   | +    | +    |

\*holoplankton, \*\* meroplankton

**Table S3.** Descriptive statistics of physicochemical parameters under study, both seasons.

| Variable              | Descriptive Statistics (2013-2020) |        |         |         |                |                |          |
|-----------------------|------------------------------------|--------|---------|---------|----------------|----------------|----------|
|                       | Mean                               | Median | Minimum | Maximum | Lower Quartile | Upper Quartile | Std.Dev. |
| T[oC]                 | 18.60                              | 20.31  | 5.20    | 27.12   | 13.13          | 23.79          | 6.35     |
| S[%o]                 | 14.67                              | 15.59  | 0.11    | 19.91   | 13.53          | 17.35          | 3.80     |
| O <sub>2</sub> [μM]   | 318.94                             | 314.41 | 119.24  | 495.60  | 284.60         | 354.60         | 49.33    |
| O <sub>2</sub> [%]    | 117.34                             | 114.10 | 45.25   | 192.50  | 105.40         | 128.55         | 19.17    |
| PO <sub>4</sub> [μM]  | 0.34                               | 0.24   | 0.01    | 3.04    | 0.10           | 0.44           | 0.38     |
| SiO <sub>4</sub> [μM] | 14.19                              | 6.46   | 0.05    | 168.32  | 3.06           | 15.57          | 20.75    |
| NO <sub>2</sub> [μM]  | 1.91                               | 0.41   | 0.01    | 50.85   | 0.14           | 1.06           | 5.14     |
| NO <sub>3</sub> [μM]  | 5.21                               | 2.53   | 0.01    | 69.23   | 1.49           | 5.59           | 7.46     |
| NH <sub>4</sub> [μM]  | 7.69                               | 5.43   | 0.12    | 64.41   | 1.93           | 10.86          | 7.93     |

**Table S4.** Descriptive statistics of physicochemical parameters under study, cold season.

| Variable              | Season=Cold descriptive statistics (2013-2020) |        |         |         |                |                |          |
|-----------------------|------------------------------------------------|--------|---------|---------|----------------|----------------|----------|
|                       | Mean                                           | Median | Minimum | Maximum | Lower Quartile | Upper Quartile | Std.Dev. |
| T[oC]                 | 8.76                                           | 8.50   | 5.20    | 13.27   | 7.54           | 9.71           | 1.96     |
| S[%o]                 | 15.98                                          | 16.01  | 0.55    | 19.75   | 15.20          | 17.84          | 2.77     |
| O <sub>2</sub> [μM]   | 330.84                                         | 332.27 | 242.50  | 416.68  | 302.79         | 357.28         | 31.90    |
| O <sub>2</sub> [%]    | 100.78                                         | 100.82 | 72.70   | 118.30  | 96.20          | 107.50         | 8.35     |
| PO <sub>4</sub> [μM]  | 0.35                                           | 0.21   | 0.02    | 2.33    | 0.11           | 0.44           | 0.39     |
| SiO <sub>4</sub> [μM] | 29.32                                          | 18.74  | 2.59    | 168.32  | 12.20          | 36.61          | 29.86    |
| NO <sub>2</sub> [μM]  | 0.57                                           | 0.38   | 0.06    | 8.18    | 0.24           | 0.69           | 0.85     |
| NO <sub>3</sub> [μM]  | 3.98                                           | 2.49   | 0.69    | 21.20   | 1.87           | 3.92           | 3.95     |
| NH <sub>4</sub> [μM]  | 5.76                                           | 3.96   | 0.21    | 64.41   | 1.96           | 6.82           | 7.38     |

**Table S5.** Descriptive statistics of physicochemical parameters under study, warm season.

| Variable              | Season=Warm descriptive statistics (2013-2020) |        |         |         |                |                |          |
|-----------------------|------------------------------------------------|--------|---------|---------|----------------|----------------|----------|
|                       | Mean                                           | Median | Minimum | Maximum | Lower Quartile | Upper Quartile | Std.Dev. |
| T[oC]                 | 21.93                                          | 23.04  | 14.90   | 27.12   | 19.25          | 24.32          | 2.98     |
| S[%o]                 | 14.22                                          | 15.39  | 0.11    | 19.91   | 12.72          | 17.23          | 4.00     |
| O <sub>2</sub> [μM]   | 314.94                                         | 305.25 | 119.24  | 495.60  | 275.55         | 350.70         | 53.40    |
| O <sub>2</sub> [%]    | 123.94                                         | 122.81 | 45.25   | 192.50  | 111.70         | 134.90         | 18.26    |
| PO <sub>4</sub> [μM]  | 0.34                                           | 0.25   | 0.01    | 3.04    | 0.09           | 0.44           | 0.38     |
| SiO <sub>4</sub> [μM] | 9.10                                           | 4.96   | 0.05    | 95.76   | 2.50           | 9.58           | 13.21    |
| NO <sub>2</sub> [μM]  | 2.36                                           | 0.45   | 0.01    | 50.85   | 0.13           | 1.29           | 5.85     |
| NO <sub>3</sub> [μM]  | 5.62                                           | 2.56   | 0.01    | 69.23   | 1.37           | 6.19           | 8.28     |
| NH <sub>4</sub> [μM]  | 8.35                                           | 6.08   | 0.12    | 53.62   | 1.83           | 12.41          | 8.02     |

**Table S6.** Statistical differences of physicochemical parameters under study, cold and warm seasons.

| Variable              | T-Tests; Grouping: Season Group 1: Warm Group 2: Cold |           |          |     |          |              |              |               |               |                   |             |
|-----------------------|-------------------------------------------------------|-----------|----------|-----|----------|--------------|--------------|---------------|---------------|-------------------|-------------|
|                       | Mean Warm                                             | Mean Cold | t-value  | df  | p        | Valid N Warm | Valid N Cold | Std.Dev. Warm | Std.Dev. Cold | F-ratio Variances | p Variances |
| T[°C]                 | 21.93                                                 | 8.76      | 40.85008 | 386 | 0.000000 | 290          | 98           | 2.98          | 1.96          | 2.31747           | 0.000003    |
| S[%]                  | 14.22                                                 | 15.98     | -4.02809 | 386 | 0.000068 | 290          | 98           | 4.00          | 2.77          | 2.07638           | 0.000043    |
| O <sub>2</sub> [µM]   | 314.94                                                | 330.84    | -2.79733 | 391 | 0.005407 | 294          | 99           | 53.40         | 31.90         | 2.80280           | 0.000000    |
| O <sub>2</sub> [%]    | 123.94                                                | 100.78    | 12.05422 | 342 | 0.000000 | 246          | 98           | 18.26         | 8.35          | 4.77728           | 0.000000    |
| PO <sub>4</sub> [µM]  | 0.34                                                  | 0.35      | -0.26403 | 391 | 0.791900 | 294          | 99           | 0.38          | 0.39          | 1.09326           | 0.568046    |
| SiO <sub>4</sub> [µM] | 9.10                                                  | 29.32     | -9.24735 | 391 | 0.000000 | 294          | 99           | 13.21         | 29.86         | 5.11039           | 0.000000    |
| NO <sub>2</sub> [µM]  | 2.36                                                  | 0.57      | 3.02642  | 391 | 0.002638 | 294          | 99           | 5.85          | 0.85          | 47.17083          | 0.000000    |
| NO <sub>3</sub> [µM]  | 5.62                                                  | 3.98      | 1.90068  | 391 | 0.058079 | 294          | 99           | 8.28          | 3.95          | 4.39463           | 0.000000    |
| NH <sub>4</sub> [µM]  | 8.35                                                  | 5.76      | 2.83432  | 391 | 0.004831 | 294          | 99           | 8.02          | 7.38          | 1.18074           | 0.335177    |

**Table S7.** Correlations (all) between biological and environmental parameters.

| Variable                                                         | All Groups Correlations; Marked correlations are significant at $p < .05000$<br>N=344 (Casewise deletion of missing data) |          |            |           |             |              |             |             |             |
|------------------------------------------------------------------|---------------------------------------------------------------------------------------------------------------------------|----------|------------|-----------|-------------|--------------|-------------|-------------|-------------|
|                                                                  | T<br>[°C]                                                                                                                 | S<br>[‰] | O2<br>[μM] | O2<br>[%] | PO4<br>[μM] | SiO4<br>[μM] | NO2<br>[μM] | NO3<br>[μM] | NH4<br>[μM] |
| Nonfodder ( <i>Noctiluca scintillans</i> ) [ind/m <sup>3</sup> ] | 0.19                                                                                                                      | -0.05    | 0.03       | 0.18      | 0.00        | -0.10        | 0.06        | 0.00        | 0.04        |
| Copepoda [ind/m <sup>3</sup> ]                                   | 0.15                                                                                                                      | 0.08     | -0.16      | -0.04     | 0.03        | -0.01        | -0.03       | 0.34        | -0.08       |
| Cladocera [ind/m <sup>3</sup> ]                                  | 0.26                                                                                                                      | -0.07    | -0.10      | 0.10      | -0.04       | -0.14        | 0.08        | 0.06        | 0.00        |
| Meroplankton [ind/m <sup>3</sup> ]                               | 0.20                                                                                                                      | -0.20    | 0.04       | 0.17      | -0.01       | -0.09        | 0.07        | 0.09        | 0.04        |
| Other groups [ind/m <sup>3</sup> ]                               | 0.33                                                                                                                      | 0.23     | -0.31      | -0.03     | -0.09       | -0.17        | 0.02        | 0.16        | -0.14       |
| Fodder ZPK [ind/m <sup>3</sup> ]                                 | 0.26                                                                                                                      | -0.06    | -0.11      | 0.08      | 0.00        | -0.09        | 0.04        | 0.28        | -0.04       |
| Total ZPK [ind/m <sup>3</sup> ]                                  | 0.32                                                                                                                      | -0.08    | -0.06      | 0.19      | 0.00        | -0.13        | 0.07        | 0.20        | 0.00        |
|                                                                  |                                                                                                                           |          |            |           |             |              |             |             |             |
| Nonfodder ( <i>Noctiluca scintillans</i> ) [mg/m <sup>3</sup> ]  | 0.19                                                                                                                      | -0.05    | 0.03       | 0.18      | 0.00        | -0.10        | 0.06        | 0.00        | 0.04        |
| Copepoda [mg/m <sup>3</sup> ]                                    | 0.10                                                                                                                      | 0.08     | -0.15      | -0.07     | 0.01        | 0.02         | -0.06       | 0.29        | -0.05       |
| Cladocera [mg/m <sup>3</sup> ]                                   | 0.32                                                                                                                      | 0.00     | -0.22      | 0.03      | -0.07       | -0.15        | 0.07        | 0.06        | -0.04       |
| Meroplankton [mg/m <sup>3</sup> ]                                | 0.14                                                                                                                      | -0.20    | 0.10       | 0.17      | 0.01        | -0.07        | 0.06        | 0.14        | 0.07        |
| Other groups [mg/m <sup>3</sup> ]                                | 0.30                                                                                                                      | 0.21     | -0.34      | -0.09     | -0.09       | -0.15        | 0.02        | 0.17        | -0.13       |
| Fodder ZPK [mg/m <sup>3</sup> ]                                  | 0.27                                                                                                                      | 0.03     | -0.19      | 0.02      | -0.04       | -0.11        | 0.02        | 0.27        | -0.05       |
| Total ZPK [mg/m <sup>3</sup> ]                                   | 0.25                                                                                                                      | -0.05    | -0.01      | 0.19      | -0.01       | -0.12        | 0.07        | 0.05        | 0.03        |

**Table S8.** Correlations (warm season) between biological and environmental parameters.

| Season=Warm Correlations; Marked correlations are significant at $p < .05000$<br>N=246 (Casewise deletion of missing data) |           |          |            |           |             |              |             |             |             |
|----------------------------------------------------------------------------------------------------------------------------|-----------|----------|------------|-----------|-------------|--------------|-------------|-------------|-------------|
|                                                                                                                            | T<br>[°C] | S<br>[‰] | O2<br>[μM] | O2<br>[%] | PO4<br>[μM] | SiO4<br>[μM] | NO2<br>[μM] | NO3<br>[μM] | NH4<br>[μM] |
| Nonfodder (Noctiluca scintillans)<br>[ind/m <sup>3</sup> ]                                                                 | 0.05      | -0.02    | 0.05       | 0.10      | 0.02        | 0.00         | 0.02        | -0.06       | 0.03        |
| Copepoda [ind/m <sup>3</sup> ]                                                                                             | 0.18      | 0.11     | -0.17      | -0.12     | 0.06        | -0.01        | -0.04       | 0.35        | -0.12       |
| Cladocera [ind/m <sup>3</sup> ]                                                                                            | 0.15      | -0.02    | -0.08      | -0.03     | -0.03       | -0.08        | 0.05        | 0.05        | -0.05       |
| Meroplankton [ind/m <sup>3</sup> ]                                                                                         | 0.05      | -0.18    | 0.06       | 0.06      | 0.01        | 0.03         | 0.05        | 0.07        | 0.00        |
| Other groups [ind/m <sup>3</sup> ]                                                                                         | 0.30      | 0.31     | -0.31      | -0.20     | -0.09       | -0.15        | -0.01       | 0.15        | -0.21       |
| Fodder ZPK [ind/m <sup>3</sup> ]                                                                                           | 0.18      | -0.02    | -0.10      | -0.06     | 0.03        | -0.01        | 0.01        | 0.28        | -0.09       |
| Total ZPK [ind/m <sup>3</sup> ]                                                                                            | 0.16      | -0.03    | -0.04      | 0.03      | 0.04        | -0.01        | 0.02        | 0.16        | -0.05       |
| Nonfodder (Noctiluca scintillans)<br>[mg/m <sup>3</sup> ]                                                                  | 0.05      | -0.02    | 0.05       | 0.10      | 0.02        | 0.00         | 0.02        | -0.06       | 0.03        |
| Copepoda [mg/m <sup>3</sup> ]                                                                                              | 0.16      | 0.07     | -0.17      | -0.13     | 0.04        | -0.01        | -0.07       | 0.32        | -0.07       |
| Cladocera [mg/m <sup>3</sup> ]                                                                                             | 0.27      | 0.06     | -0.21      | -0.13     | -0.08       | -0.10        | 0.04        | 0.05        | -0.10       |
| Meroplankton [mg/m <sup>3</sup> ]                                                                                          | -0.06     | -0.19    | 0.12       | 0.07      | 0.04        | 0.04         | 0.04        | 0.14        | 0.04        |
| Other groups [mg/m <sup>3</sup> ]                                                                                          | 0.34      | 0.28     | -0.34      | -0.23     | -0.11       | -0.13        | 0.00        | 0.17        | -0.19       |
| Fodder ZPK [mg/m <sup>3</sup> ]                                                                                            | 0.22      | 0.07     | -0.19      | -0.14     | -0.02       | -0.05        | -0.01       | 0.28        | -0.11       |
| Total ZPK [mg/m <sup>3</sup> ]                                                                                             | 0.09      | -0.01    | 0.01       | 0.07      | 0.02        | -0.01        | 0.02        | 0.00        | 0.01        |

**Table S9.** Correlations (cold season) between biological and environmental parameters.

| Season=Cold Correlations; Marked correlations are significant at $p < .05000$<br>N=98 (Casewise deletion of missing data) |           |          |            |           |             |              |             |             |             |
|---------------------------------------------------------------------------------------------------------------------------|-----------|----------|------------|-----------|-------------|--------------|-------------|-------------|-------------|
|                                                                                                                           | T<br>[°C] | S<br>[‰] | O2<br>[μM] | O2<br>[%] | PO4<br>[μM] | SiO4<br>[μM] | NO2<br>[μM] | NO3<br>[μM] | NH4<br>[μM] |
| Nonfodder ( <i>Noctiluca scintillans</i> )<br>[ind/m <sup>3</sup> ]                                                       | 0.29      | 0.06     | 0.03       | 0.21      | -0.04       | -0.14        | 0.64        | 0.54        | -0.13       |
| Copepoda [ind/m <sup>3</sup> ]                                                                                            | -0.12     | 0.05     | 0.07       | 0.02      | -0.10       | 0.18         | 0.04        | 0.14        | -0.01       |
| Cladocera [ind/m <sup>3</sup> ]                                                                                           | 0.24      | -0.02    | 0.08       | 0.23      | 0.08        | -0.11        | 0.31        | 0.60        | -0.15       |
| Meroplankton [ind/m <sup>3</sup> ]                                                                                        | 0.09      | 0.00     | 0.21       | 0.29      | -0.06       | -0.12        | 0.08        | 0.14        | 0.01        |
| Other groups [ind/m <sup>3</sup> ]                                                                                        | 0.33      | 0.23     | 0.00       | 0.24      | -0.03       | 0.07         | 0.00        | 0.30        | -0.13       |
| Fodder ZPK [ind/m <sup>3</sup> ]                                                                                          | -0.01     | 0.03     | 0.16       | 0.19      | -0.09       | 0.04         | 0.07        | 0.18        | 0.00        |
| Total ZPK [ind/m <sup>3</sup> ]                                                                                           | 0.17      | 0.06     | 0.13       | 0.26      | -0.09       | -0.06        | 0.45        | 0.46        | -0.08       |
|                                                                                                                           |           |          |            |           |             |              |             |             |             |
| Nonfodder ( <i>Noctiluca scintillans</i> )<br>[mg/m <sup>3</sup> ]                                                        | 0.29      | 0.06     | 0.03       | 0.21      | -0.04       | -0.14        | 0.64        | 0.54        | -0.13       |
| Copepoda [mg/m <sup>3</sup> ]                                                                                             | -0.02     | 0.19     | 0.01       | 0.04      | -0.11       | 0.14         | -0.04       | 0.04        | -0.03       |
| Cladocera [mg/m <sup>3</sup> ]                                                                                            | 0.26      | 0.00     | 0.06       | 0.22      | 0.07        | -0.11        | 0.32        | 0.61        | -0.16       |
| Meroplankton [mg/m <sup>3</sup> ]                                                                                         | 0.03      | -0.03    | 0.21       | 0.26      | -0.05       | -0.10        | 0.07        | 0.08        | 0.04        |
| Other groups [mg/m <sup>3</sup> ]                                                                                         | 0.26      | 0.04     | -0.29      | -0.19     | 0.13        | -0.03        | -0.16       | -0.07       | -0.13       |
| Fodder ZPK [mg/m <sup>3</sup> ]                                                                                           | 0.04      | 0.11     | 0.09       | 0.15      | -0.08       | 0.03         | 0.00        | 0.07        | -0.02       |
| Total ZPK [mg/m <sup>3</sup> ]                                                                                            | 0.29      | 0.08     | 0.05       | 0.24      | -0.06       | -0.13        | 0.61        | 0.53        | -0.13       |
